# Supplementary material for: Syntheses, crystal structures and UV-visible absorption properties of five metal–organic frameworks constructed from terphenyl-2,5,2′,5′-tetracarboxylic acid and bis(imidazole) bridging ligands
Source: Royal Society of Chemistry journal article supplement (doi:10.1039/c3dt53379d), 2014-01-01
Supplement: c3dt53379d1.pdf [file c3dt53379d1.pdf]

*Electronic Supplementary Information (ESI) for*

**Syntheses, Crystal Structures, UV-Visible Absorption Properties of Five  
Metal-Organic Frameworks Constructed From Terphenyl-2,5,2',5'-tetracarboxylic  
Acid and Bis(imidazole) Bridging Ligands**

**Liming Fan,<sup>a,b</sup> Xiutang Zhang,<sup>\*a,b</sup> Wei Zhang,<sup>b</sup> Yuanshuai Ding,<sup>b</sup> Weiliu Fan,<sup>a</sup> Liming Sun,<sup>a</sup> Yue Pang,<sup>a</sup>  
Xian Zhao<sup>\*a</sup>**

<sup>a</sup> State Key Laboratory of Crystal Materials, Shandong University, Jinan 250100, China,

<sup>b</sup> Advanced Material Institute of Research, College of Chemistry and Chemical Engineering, Qilu Normal University,  
Jinan, 250013, China.

E-mail: zhaoxian@icm.sdu.edu.cn; xiutangzhang@163.com.

ESI

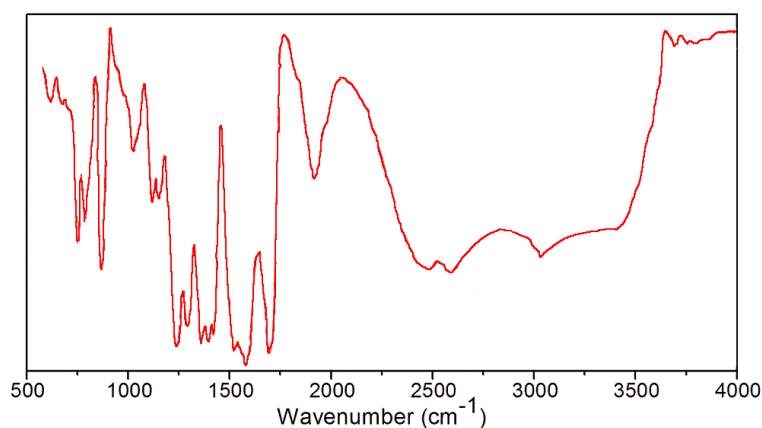

(a)

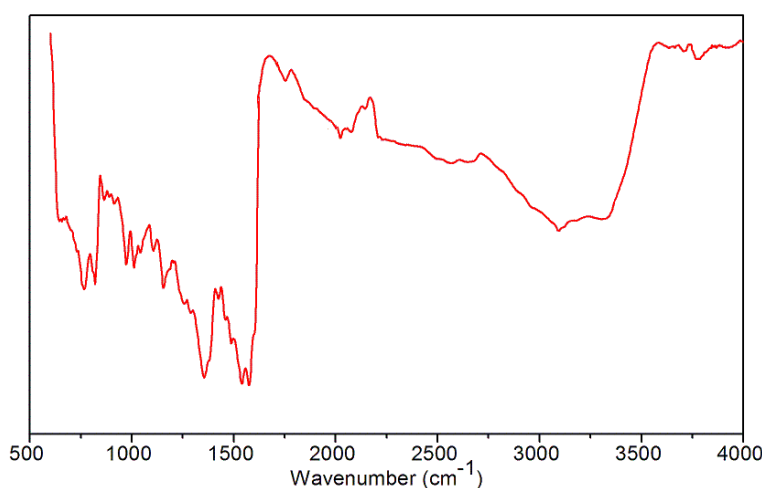

(b)

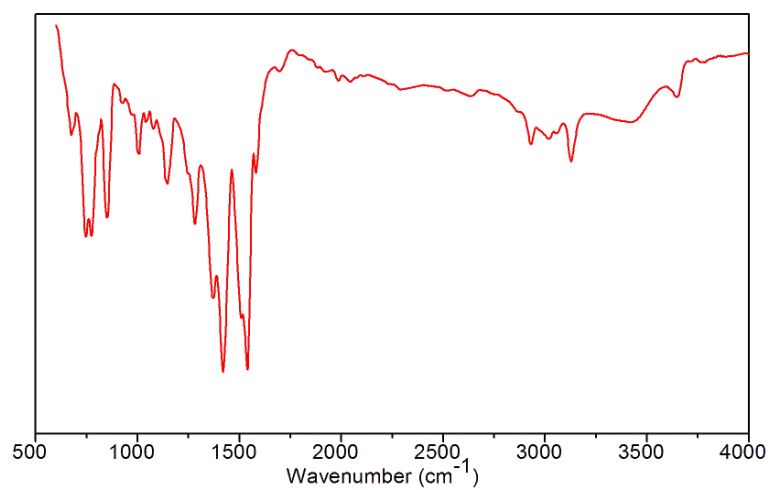

(c)

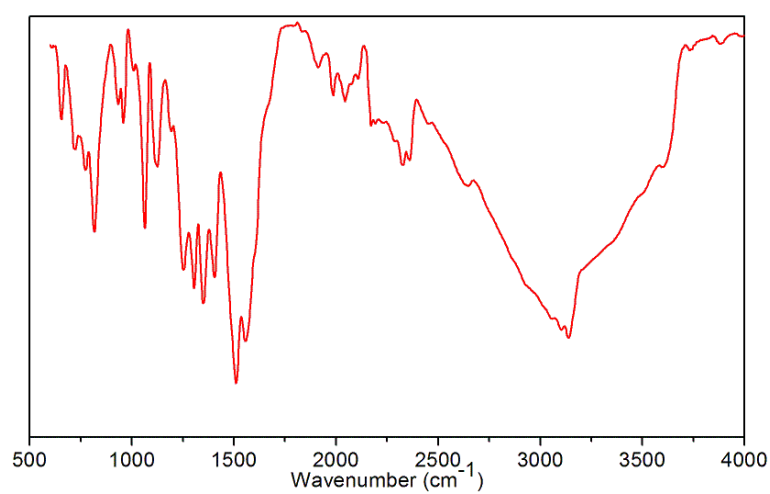

(d)

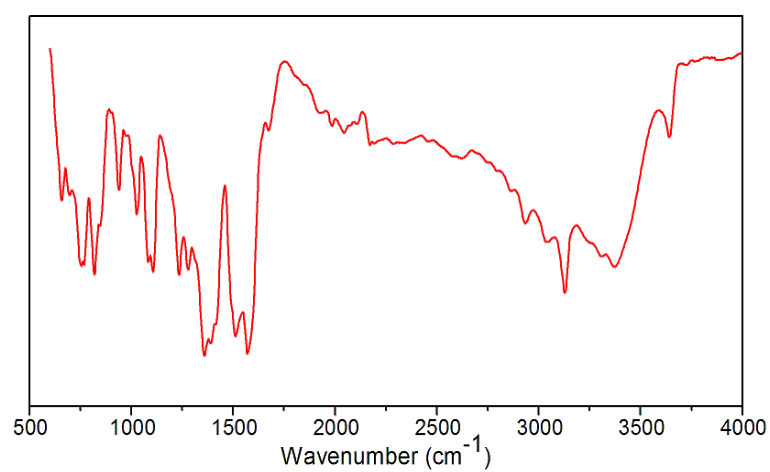

(e)

**Figure S1.** IR spectra of **1** (a), **2** (b), **3** (c), **4** (d), and **5** (e).

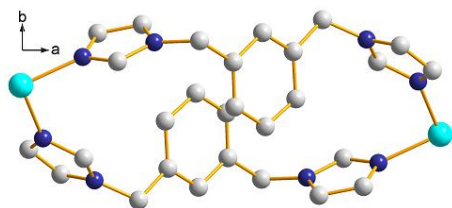

**Figure S2.** The  $[M(1,3\text{-bimb})]_2$  loop in compound **1** ( $M=\text{Ni}$ ) and **2** ( $M=\text{Mn}$ ).

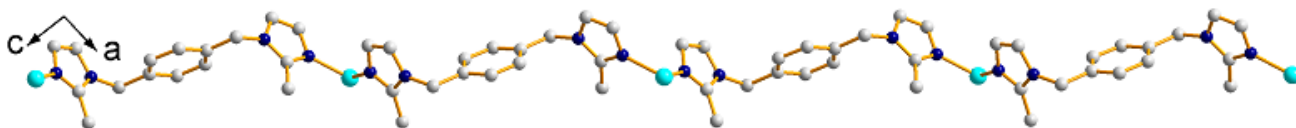

**Figure S3.** The  $[\text{Ni}(1,4\text{-bmib})]_n$  chain in compound **3**.

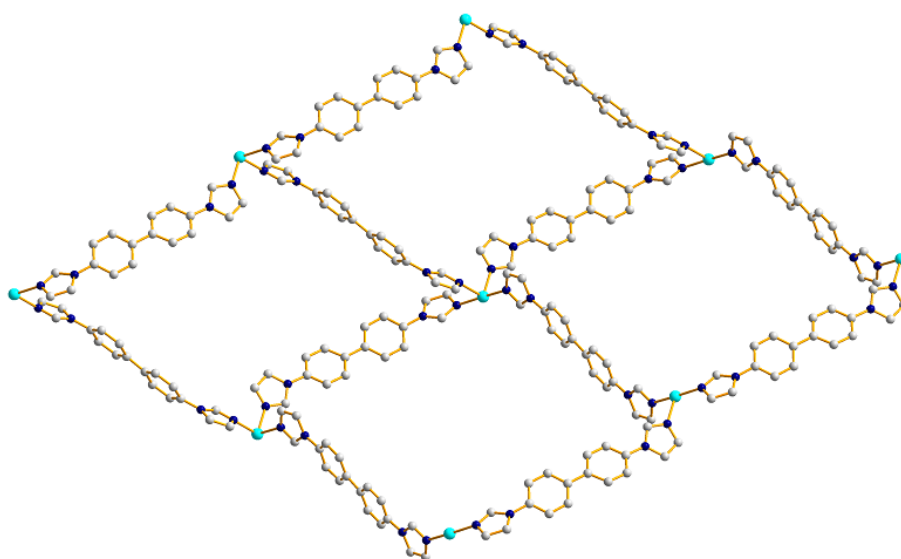

**Figure S4.** The  $[\text{Ni}(4,4'\text{-bibp})]_n$  net in compound **4**.

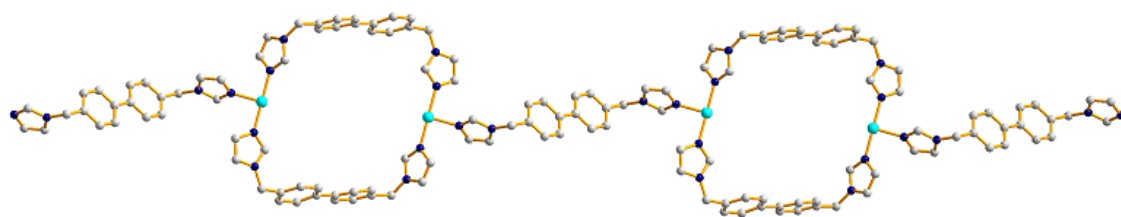

**Figure S5.** The  $[\text{Ni}(4,4'\text{-bimbp})]_n$  chain in compound **5**.

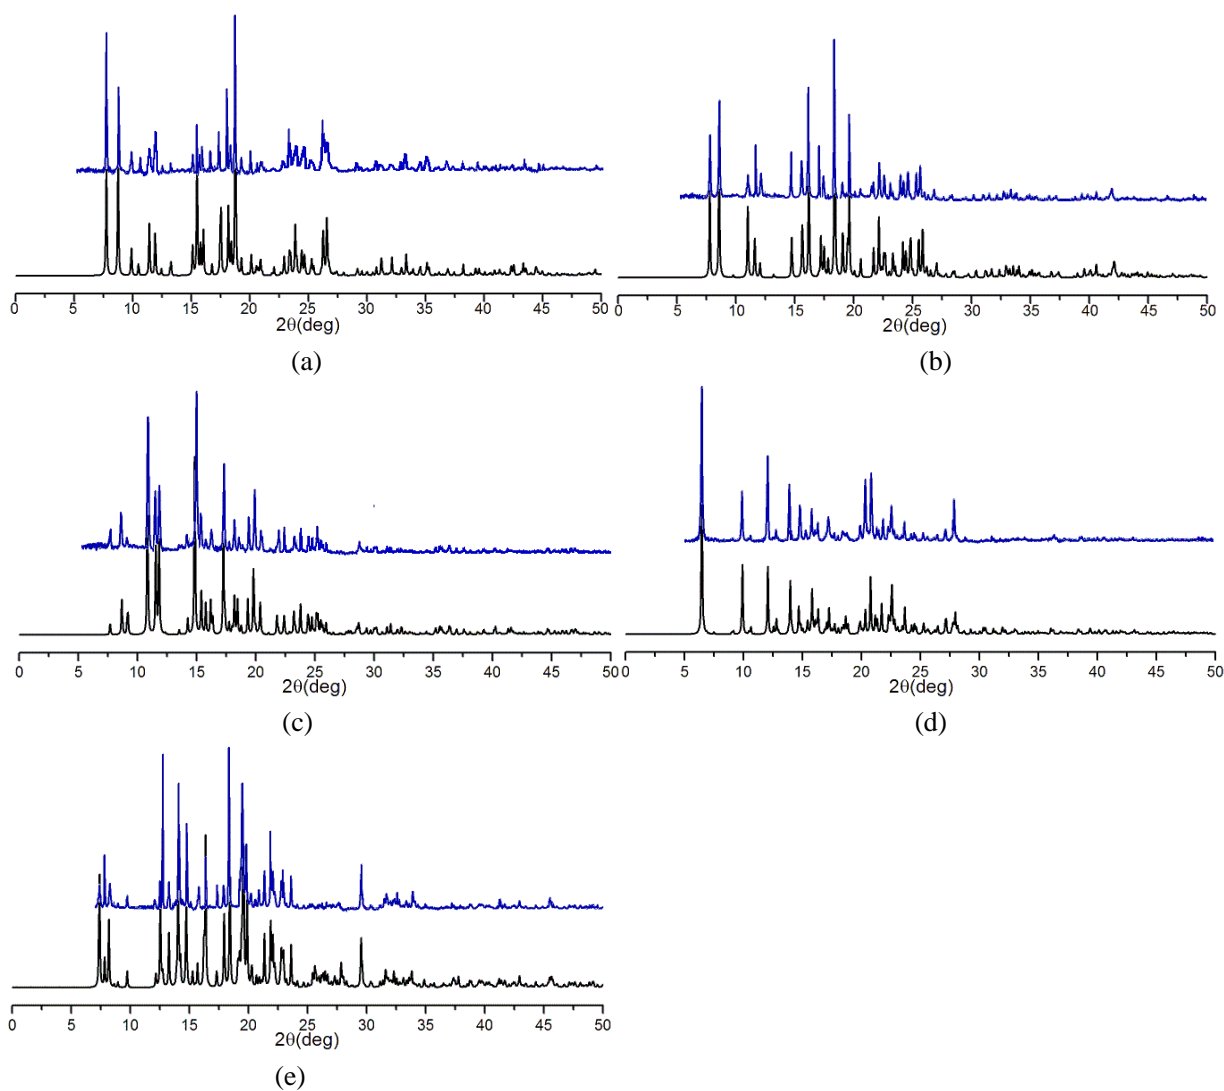

**Figure S6.** PXRD patterns of **1** (a), **2** (b), **3** (c), **4** (d), and **5** (e). Dark: calculated from the X-ray single-crystal data; Blue: observed for the as-synthesized solids.
